# Supplementary material for: Delocalized hole transport coupled to sub-ns tryptophanyl deprotonation promotes photoreduction of class II photolyases
Source: Royal Society of Chemistry journal article supplement (doi:10.1039/c8cp04548h), 2018-01-01
Supplement: c8cp04548h1.pdf [file c8cp04548h1.pdf]

## ELECTRONIC SUPPLEMENTARY INFORMATION

### Delocalized Hole Transport Coupled to Sub-ns Tryptophanyl Deprotonation Promotes Photoreduction of Class II Photolyases

Fabien Lacomat,<sup>a</sup> Agathe Espagne,<sup>a</sup> Nadia Dozova,<sup>a</sup> Pascal Plaza,<sup>\*,a</sup> Elisabeth Ignatz,<sup>b</sup> Stephan Kiontke,<sup>b</sup> Lars-Oliver Essen<sup>\*,b</sup>

<sup>a</sup> PASTEUR, Département de chimie, École normale supérieure, PSL University, Sorbonne Université, CNRS, 75005 Paris, France. E-mail: pascal.plaza@ens.fr

<sup>b</sup> Department of Chemistry, LOEWE Center for Synthetic Microbiology, Philipps University, 35032 Marburg, Germany. E-mail: essen@chemie.uni-marburg.de

#### Contents

|                                                        |    |
|--------------------------------------------------------|----|
| S1. Steady-state absorption spectra.....               | 2  |
| S2. Transient absorption and anisotropy spectra .....  | 3  |
| S2.1. WT and Y345F in H <sub>2</sub> O buffer .....    | 3  |
| S2.2. WT in D <sub>2</sub> O buffer .....              | 3  |
| S3. Global kinetic analysis .....                      | 4  |
| S3.1. Example fits .....                               | 4  |
| S3.2. WT in D <sub>2</sub> O buffer .....              | 6  |
| S4. Spectral fitting.....                              | 6  |
| S4.1. Reference absorption spectra .....               | 6  |
| S4.2. EADS3 (WT) .....                                 | 7  |
| S4.3. Difference between EADS2 and EADS3 (WT) .....    | 8  |
| S4.4. Difference between EADS3 and EADS4 (WT) .....    | 9  |
| S4.5. Difference between EADS3 and EADS4 (Y345F) ..... | 11 |

## S1. Steady-state absorption spectra

The steady-state absorption spectra of the *Mm*CPDII samples used for the transient absorption experiments are reproduced in Figure S1A (normalized views are shown in Figure S1B). They essentially exhibit the characteristic bands of  $\text{FAD}_{\text{ox}}$ ,<sup>1-3</sup> peaking here at 377 ( $\text{S}_0 \rightarrow \text{S}_2$  transition) and 444 nm ( $\text{S}_0 \rightarrow \text{S}_1$  transition). These bands show further vibrational structures, due to the rigid environment of the molecule within the protein, in contrast with the much smoother shape of the same bands in solution.<sup>4</sup> No substantial presence of  $\text{FADH}^\bullet$ , characterized by distinctive peaks around 590 and 635 nm,<sup>1-3</sup> can be appreciated in the red part of the spectrum. Given that the  $\text{S}_0\text{S}_1$  band is slightly more intense than the  $\text{S}_0\text{S}_2$  band as in pure  $\text{FAD}_{\text{ox}}$  samples, it may be inferred that the amount of  $\text{FADH}^-$ , characterized by an absorption band growing below 450 nm,<sup>4,5</sup> is rather low.

Using a commonly admitted value of absorption coefficient of  $\text{FAD}_{\text{ox}}$  at the maximum of its  $\text{S}_0 \rightarrow \text{S}_1$  transition ( $11300 \text{ M}^{-1}\text{cm}^{-1}$ ),<sup>6</sup> the concentration of  $\text{FAD}_{\text{ox}}$  is estimated to *ca.* 145  $\mu\text{M}$  in the case of the WT sample in  $\text{H}_2\text{O}$  buffer, 109  $\mu\text{M}$  for WT in  $\text{D}_2\text{O}$  and 278  $\mu\text{M}$  for Y345F in  $\text{H}_2\text{O}$ .

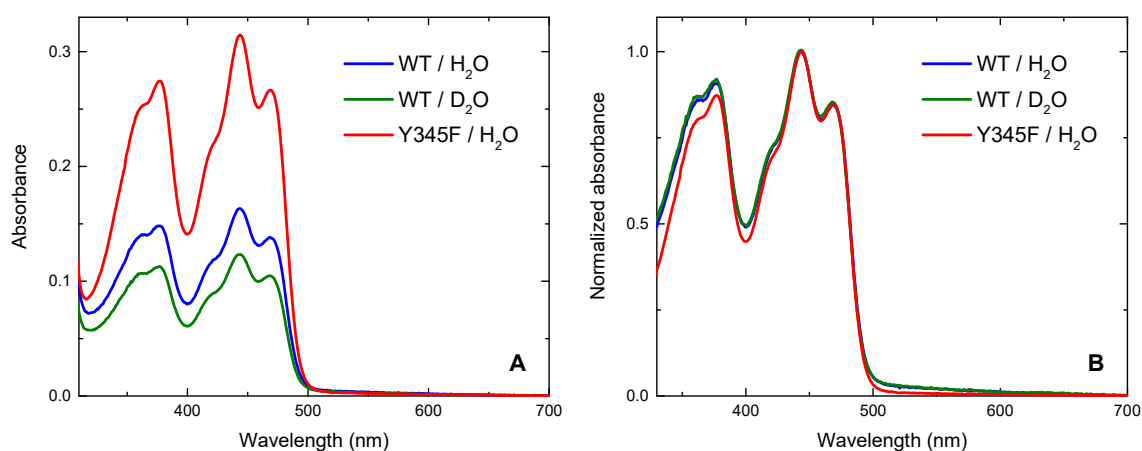

**Figure S1.** (A) Steady-state absorption spectrum (optical path = 1 mm) of the *Mm*CPDII samples used for the transient absorption experiments: WT in  $\text{H}_2\text{O}$  buffer in blue, WT in  $\text{D}_2\text{O}$  in green and Y345F in  $\text{H}_2\text{O}$  in red line. (B) Same spectra arbitrarily normalized at 444 nm.

## S2. Transient absorption and anisotropy spectra

### S2.1. WT and Y345F in H<sub>2</sub>O buffer

The isotropic transient absorption spectra of *Mm*CPDII in H<sub>2</sub>O buffer were given in the main text for both WT and Y345F (Figure 2). The corresponding transient anisotropy spectra, calculated from the same parallel and perpendicular transient absorption spectra, are here shown in Figure S2.

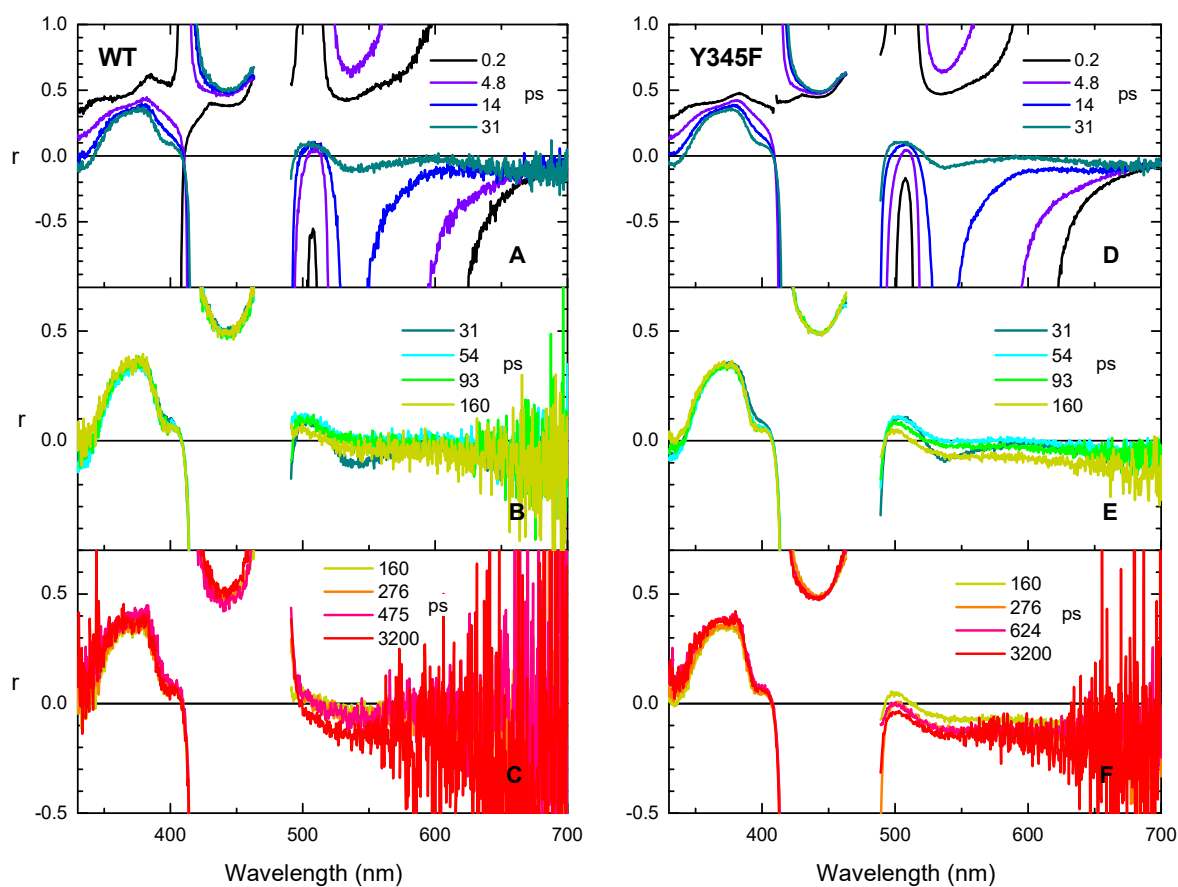

**Figure S2.** Transient anisotropy ( $r$ ) of *Mm*CPDII in H<sub>2</sub>O buffer, at selected pump-probe delays. WT is shown in panels A-C and Y345F in panels D-F.

### S2.2. WT in D<sub>2</sub>O buffer

The isotropic transient absorption spectra and transient anisotropy spectra of WT-*Mm*CPDII in D<sub>2</sub>O buffer are shown in Figure S3.

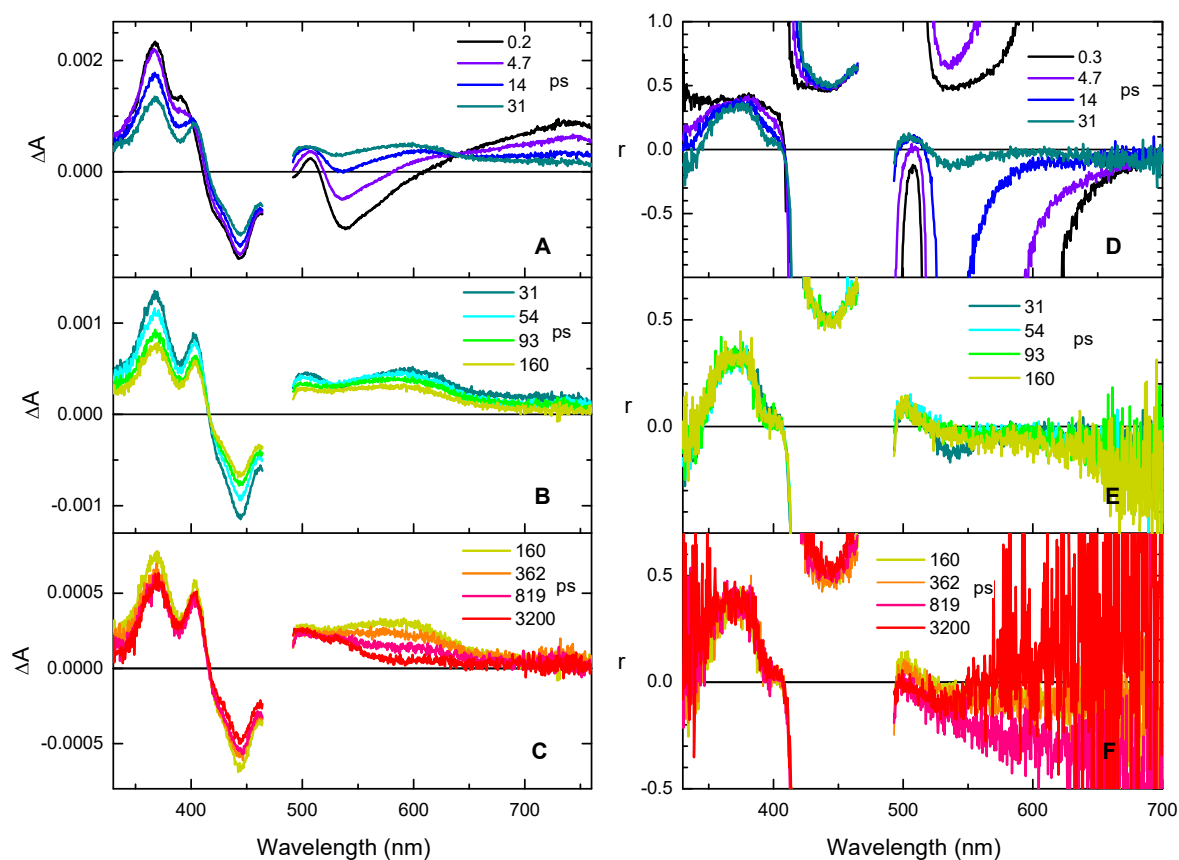

**Figure S3.** (A-C) Isotropic transient absorption spectra of *MmCPDII* in  $D_2O$  buffer, at selected pump-probe delays, after fs excitation at 475 nm. (D-F) Corresponding transient anisotropy spectra.

### S3. Global kinetic analysis

#### S3.1. Example fits

Figure S4 demonstrates the quality of the global multiexponential fits performed on the polarized transient absorption data. The kinetic traces of both isotropic transient absorption and transient anisotropy of WT-*MmCPDII* in  $H_2O$  buffer are here shown at selected wavelengths, together with their corresponding fits. Similar qualities were obtained for the other two studied systems (WT in  $D_2O$  buffer and Y345F in  $H_2O$  buffer; not shown).

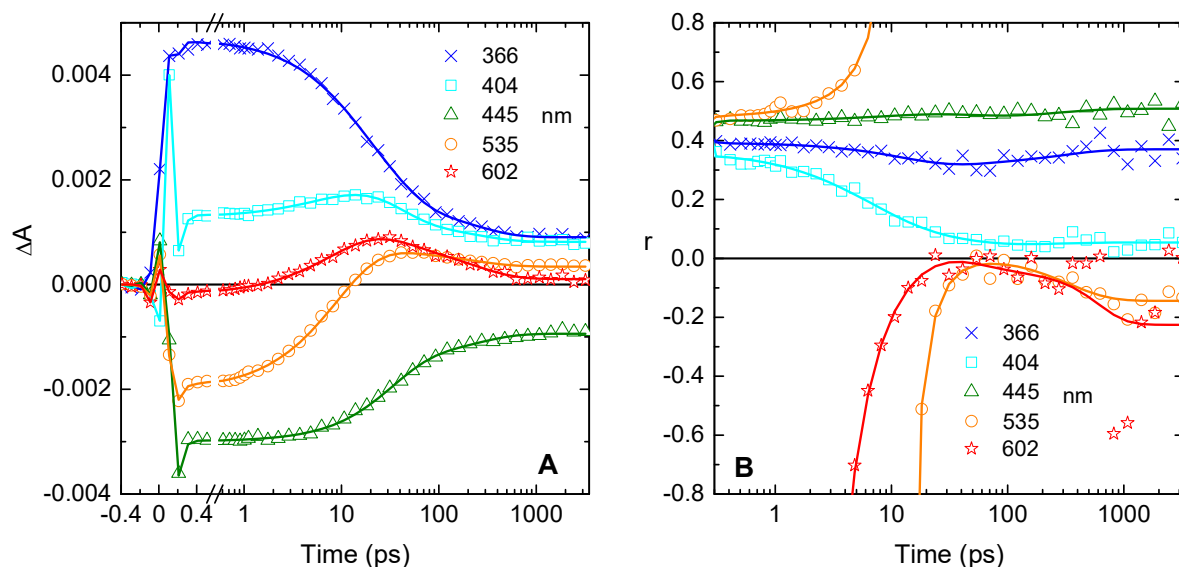

**Figure S4.** Kinetic traces of isotropic transient absorption (A) and transient anisotropy (B) of WT-*MmCPDII*, at selected wavelengths. The continuous lines are effective fits deduced from the root fit of the polarized transient absorption data.

Figure S5 compares the normalized transient absorption kinetic traces of WT-*MmCPDII* at 602 nm, in  $H_2O$  and  $D_2O$ , to illustrate the clear kinetic isotope effect on the slow decay.

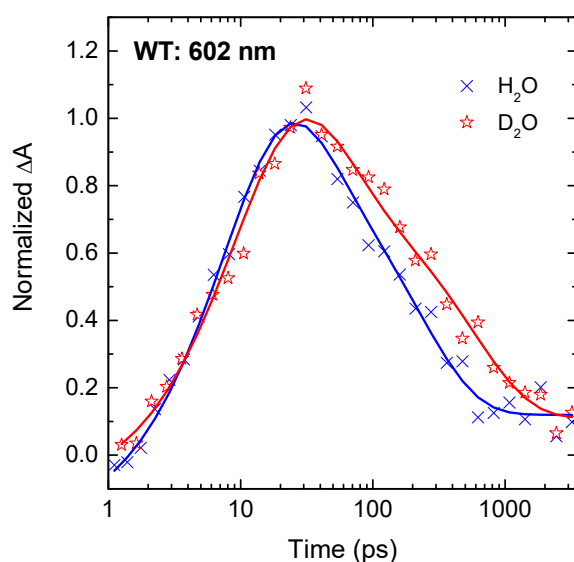

**Figure S5.** Comparison of the normalized transient absorption kinetic traces of WT-*MmCPDII* at 602 nm, in  $H_2O$  (blue crosses) and  $D_2O$  (red stars). The continuous lines are effective fits deduced from the root fit of the polarized transient absorption data.

### S3.2. WT in D<sub>2</sub>O buffer

Figure S6A shows the isotropic EADS relative to the global analysis of the transient absorption spectra of WT-*Mm*CPDII in D<sub>2</sub>O buffer. The corresponding EAAS are shown in Figure S6B.

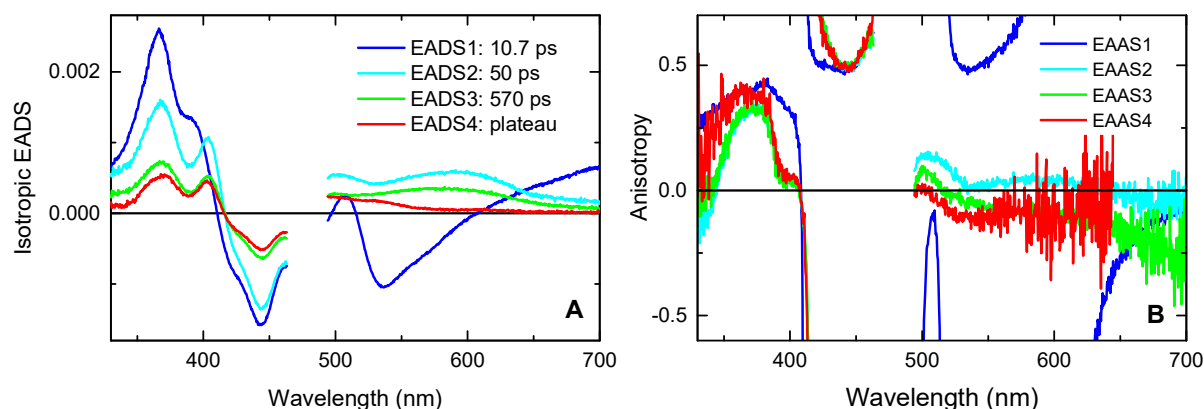

**Figure S6.** (A) Isotropic EADS deduced from the global analysis of the transient absorption spectra of WT-*Mm*CPDII in D<sub>2</sub>O buffer. (B) Corresponding EAAS. Exceedingly noisy parts of EAAS4 above 645 nm have been masked.

## S4. Spectral fitting

### S4.1. Reference absorption spectra

In order to identify the photoproducts obtained after decay of the excited state and analyze the isotropic EADS resulting from the global analysis of the data, we used a number of reference absorption spectra taken from the literature and gathered in Figure S7. The spectrum of FAD<sup>•-</sup> is taken from the work of Berndt *et al.* on *Drosophila* cryptochrome;<sup>7</sup> the spectra of WH<sup>•+</sup>, W<sup>•</sup> come from Solar *et al.*;<sup>8</sup> the YO<sup>•</sup> spectrum is taken from Aubert *et al.*<sup>9</sup> The FAD<sub>ox</sub> spectrum represented in Figure S7 is simply that of WT-*Mm*CPDII, scaled to  $\epsilon = 11300 \text{ M}^{-1} \text{ cm}^{-1}$  at 444 nm,<sup>6</sup> assuming FAD<sub>ox</sub> is the dominant FAD species in presence.

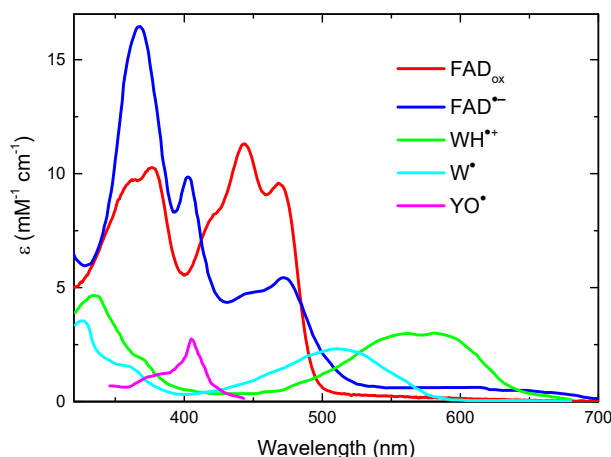

**Figure S7.** Reference spectra used to analyze the photoproduct spectra (see text above).

#### S4.2. EADS3 (WT)

The isotropic EADS3 of WT in H<sub>2</sub>O buffer was fitted with a weighted sum of reference spectra (see SI-4.1), modified with two adjustable parameters (*s*, *k*) as shown in Equation S1 (see details in the main text, §2.5). A shift of the FAD<sub>ox</sub> bleaching contribution (*s*<sub>3</sub>) was introduced to take into account differences between the calibration of the steady-state and transient-absorption spectrometers. The fit is shown in the main text (Figure 4A), the optimized parameters in Table S1 and the modified reference spectra in Figure S8A. The coefficient of determination (*R*<sup>2</sup>) was 0.992905.

$$\text{EADS3}(\lambda) = a_1 \varepsilon_{\text{FAD}^{\bullet-}}(k_1(\lambda - s_1)) + a_2 \varepsilon_{\text{WH}^{\bullet+}}(k_2(\lambda - s_2)) - a_3 \varepsilon_{\text{FAD}_{\text{ox}}}(\lambda - s_3) \quad (\text{S1})$$

The amplitudes (*a*<sub>1</sub>, *a*<sub>2</sub>, *a*<sub>3</sub>) should basically represent concentrations of the involved species (multiplied by the optical path, namely 0.1 cm) but may in fact contain an implicit coefficient globally modifying the intensity of each reference spectra. Conservation relations between them should therefore not be sought.

**Table S1.** Optimized parameters of the fit of EADS3 (WT/H<sub>2</sub>O) according to Equation S1.

| Species           | Parameter                               | Estimate | Standard error |
|-------------------|-----------------------------------------|----------|----------------|
| FAD <sup>•−</sup> | <i>a</i> <sub>1</sub> × 10 <sup>4</sup> | 2.22     | 0.02           |
|                   | <i>s</i> <sub>1</sub> (nm)              | -6.35    | 0.93           |
|                   | <i>k</i> <sub>1</sub>                   | 0.976    | 0.003          |
| WH <sup>•+</sup>  | <i>a</i> <sub>2</sub> × 10 <sup>4</sup> | 2.17     | 0.02           |
|                   | <i>s</i> <sub>2</sub> (nm)              | -86.3    | 3.4            |
|                   | <i>k</i> <sub>2</sub>                   | 0.853    | 0.005          |
| FAD <sub>ox</sub> | <i>a</i> <sub>3</sub> × 10 <sup>4</sup> | 2.15     | 0.02           |
|                   | <i>s</i> <sub>3</sub> (nm)              | 2.0      | 0.2            |

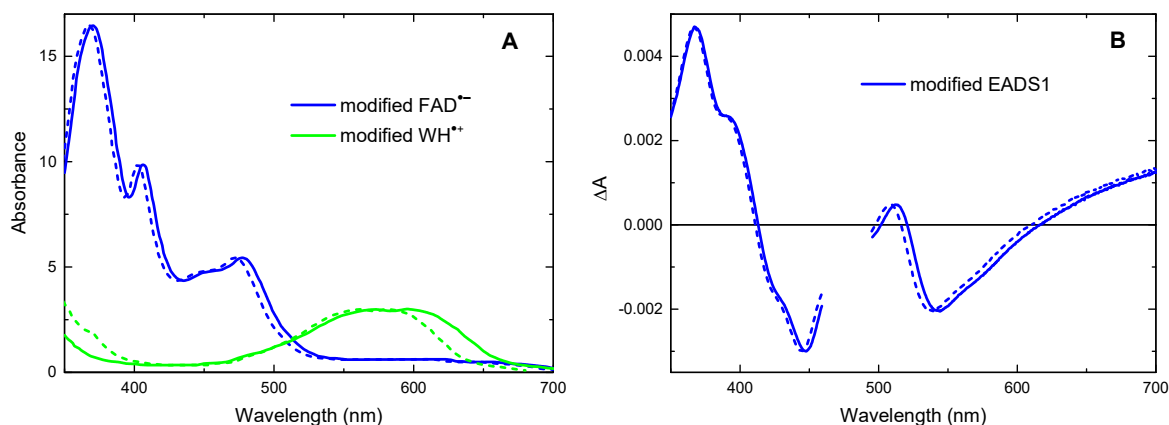

**Figure S8.** Modified spectra used to fit EADS3 (WT/H<sub>2</sub>O) according to Equation S1 (A) and Equation S2 (B). The original spectra are recalled in dotted lines.

It may be noted from Figure S8 that FAD<sup>•−</sup> has a small contribution at 600 nm, where the anisotropy measurements were taken to access the orientations of the WH<sup>•+</sup> radicals. The relative contribution of WH<sup>•+</sup> to the total absorbance of a FAD<sup>•−</sup>/WH<sup>•+</sup> pair would accordingly amount to only 0.83 at 600 nm.

#### S4.3. Difference between EADS2 and EADS3 (WT)

EADS3 was here fitted with a weighted sum of EADS2 and EADS1, according to Equation S2. A shift ( $s_2$ ) and scaling ( $k_2$ ) of EADS1 was allowed to take into account a possible difference of excited FAD<sub>ox</sub> spectrum in EADS1 and EADS2 (the fit remains however quite acceptable without any modification of EADS1). The fit is shown in the main text (Figure 4B), the optimized parameters in Table S2 and the modified EADS1 spectrum in Figure S8B. The coefficient of determination ( $R^2$ ) was 0.998236.

$$\text{EADS3}(\lambda) = \phi \text{EADS2}(\lambda) - a_1 \text{EADS1}(k_1(\lambda - s_1)) \quad (\text{S2})$$

The modified EADS1 exhibits a slight red shift of the SE band, which might be interpreted as arising from a dielectric relaxation occurring during the 9.2-ps phase in the sub-pool of slowly reacting excited flavins. The apparent shift of the GSB band is probably meaningless and due to the limited capabilities of the spectral modification implemented in Equation S2. Parameter  $a_1$  is interpreted as the fraction of the initial excited FAD<sub>ox</sub> population still present in EADS2 but absent in EADS3. Parameter  $\phi$  (61%) represents the fraction of transient population in EADS2



still present in EADS3, that is, the yield of the forward process. Correlatively  $1 - \phi$  (39%) is the yield of the backward reaction, restoring the initial configuration by charge recombination of the  $\text{FAD}^{\bullet-}/\text{WH}^{\bullet+}$  pair.

**Table S2.** Optimized parameters of the fit of EADS3 (WT/H<sub>2</sub>O) according to Equation S2.

| Spectrum | Parameter  | Estimate | Standard error |
|----------|------------|----------|----------------|
| EADS2    | $\phi$     | 0.612    | 0.002          |
|          | $a_1$      | 0.080    | 0.001          |
| EADS1    | $s_1$ (nm) | -7.3     | 0.9            |
|          | $k_1$      | 0.978    | 0.002          |

#### S4.4. Difference between EADS3 and EADS4 (WT)

EADS4 was first fitted with a weighted sum of EADS3 and a difference of  $\text{W}^{\bullet}$  and  $\text{WH}^{\bullet+}$  spectra, according to Equation S3. The fit is shown in the main text (Figure 4C), the optimized parameters in Table S3 and the modified reference spectra in Figure S9A. The coefficient of determination ( $R^2$ ) was 0.993915.

$$\text{EADS4}(\lambda) = \phi \text{EADS3}(\lambda) - a_1 \varepsilon_{\text{WH}^{\bullet+}}(k_1(\lambda - s_1)) + a_2 \varepsilon_{\text{W}^{\bullet}}(k_2(\lambda - s_2)) \quad (\text{S3})$$

Parameter  $\phi$  is interpreted as the fraction of the transient population present in EADS3 that undergoes further reaction, namely deprotonation of  $\text{WH}^{\bullet+}$ , represented by the last two terms of Equation S3;  $(1 - \phi)$  is thus the yield of charge recombination occurring in competition during the EADS3→EADS4 step.

**Table S3.** Optimized parameters of the fit of EADS4 (WT/H<sub>2</sub>O) according to Equation S3.

| Spectrum               | Parameter         | Estimate | Standard error |
|------------------------|-------------------|----------|----------------|
| EADS3                  | $\phi$            | 0.695    | 0.003          |
|                        | $a_1 \times 10^4$ | 1.42     | 0.02           |
| $\text{WH}^{\bullet+}$ | $s_1$ (nm)        | -42      | 2              |
|                        | $k_1$             | 0.903    | 0.003          |
| $\text{W}^{\bullet}$   | $a_2 \times 10^4$ | 0.93     | 0.02           |
|                        | $s_2$ (nm)        | 45       | 4              |
|                        | $k_2$             | 1.09     | 0.01           |

A better fit ( $R^2=0.995845$ ) could be obtained with an additional  $\text{YO}^{\bullet}$  component (Equation S4). The fit is shown in the main text (Figure 4D), the optimized parameters in Table S4 and the modified reference spectra in Figure S9B.

$$\text{EADS4}(\lambda) = \phi \text{EADS3}(\lambda) - a_1 \varepsilon_{\text{WH}^{*+}}(k_1(\lambda - s_1)) + a_2 \varepsilon_{\text{W}^{\bullet}}(k_2(\lambda - s_2)) + a_3 \varepsilon_{\text{YO}^{\bullet}}(k_3(\lambda - s_3)) \quad (\text{S4})$$

**Table S4.** Optimized parameters of the fit of EADS4 (WT/H<sub>2</sub>O) according to Equation S4.

| Spectrum               | Parameter         | Estimate | Standard error |
|------------------------|-------------------|----------|----------------|
| EADS3                  | $\phi$            | 0.678    | 0.003          |
| $\text{WH}^{\bullet+}$ | $a_1 \times 10^4$ | 1.37     | 0.02           |
|                        | $s_1$ (nm)        | -37      | 2              |
|                        | $k_1$             | 0.909    | 0.003          |
| $\text{W}^{\bullet}$   | $a_2 \times 10^4$ | 0.89     | 0.02           |
|                        | $s_2$ (nm)        | 44       | 4              |
|                        | $k_2$             | 1.09     | 0.01           |
| $\text{YO}^{\bullet}$  | $a_3 \times 10^4$ | 0.52     | 0.04           |
|                        | $s_3$ (nm)        | 214      | 17             |
|                        | $k_3$             | 2.2      | 0.2            |

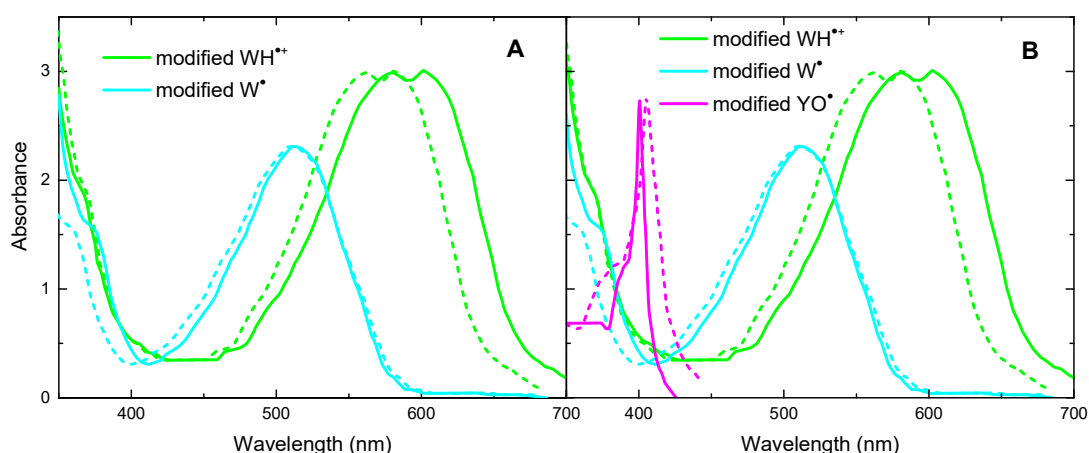

**Figure S9.** Modified reference spectra used to fit EADS4 (WT/H<sub>2</sub>O) according to Equation S3 (A) and Equation S4 (B). The original spectra are recalled in dotted lines.

According to this last fit, the quantum yield of forward reaction during the EADS3→EADS4 step is 68% ( $\phi$ ). Neglecting the implicit modifications of absorption coefficients of the reference spectra, one may use the parameters of Table S4 to crudely estimate the quantum yields of tryptophanyl deprotonation ( $\phi_{\text{td}}$ ) and tyrosine oxidation ( $\phi_{\text{to}}$ ). One tentatively gets  $\phi_{\text{td}} \approx \phi a_2 / (a_2 + a_3) = 43\%$  and  $\phi_{\text{to}} \approx \phi a_3 / (a_2 + a_3) = 25\%$  (the fact that  $a_2 + a_3$  is very close to  $a_1$  supports this approximate calculation). Accordingly, the rate of tryptophanyl deprotonation may be estimated to  $k_{\text{td}} = \phi_{\text{td}} / \tau_3 = 1.9 \text{ ns}^{-1}$  and that of tyrosine oxidation to  $k_{\text{to}} = \phi_{\text{to}} / \tau_3 = 1.1 \text{ ns}^{-1}$ . These numbers should of course be taken with care, as mere indicators of orders of magnitude.

Finally, it may be observed that the spectral fit of EADS3 (§S4.2) did not yield identical parameters for  $\text{WH}^{\bullet+}$  as that of EADS4, although the same trends (red shift and broadening of the original spectrum) are conserved. It should however be noted that the first one is not a differential fit. It involves  $\text{FAD}_{\text{ox}}$  and  $\text{FAD}^{\bullet-}$  and its purpose was to demonstrate that EADS3 results from the electron transfer from a tryptophan residue to FAD, as explained in §4.2.1 of the main text. The second one focuses on the difference between EADS3 and EADS4, charge recombination being excluded. This is the only approach that can uncover the minor production of  $\text{YO}^{\bullet}$ . The full fit of EADS4 is indeed not reliable as it involves an exceedingly long list of contributors, some of them having ambiguously overlapping spectra ( $\text{FAD}^{\bullet-}$  and  $\text{YO}^{\bullet}$ ). The difference of approach may justify the differences obtained for the modified  $\text{WH}^{\bullet+}$  spectrum.

#### S4.5. Difference between EADS3 and EADS4 (Y345F)

The spectral fit of EADS4 according to Equation S3 was repeated for Y345F. The fit and the modified reference spectra are shown in Figure S10. The optimized parameters are listed in Table S5. The coefficient of determination ( $R^2$ ) was 0.996754. No better fit was obtained by adding a  $\text{YO}^{\bullet}$  component as in Equation S4.

**Table S5.** Optimized parameters of the fit of EADS4 (Y345F) according to Equation S3.

| Spectrum               | Parameter         | Estimate | Standard error |
|------------------------|-------------------|----------|----------------|
| EADS3                  | $\phi$            | 0.81     | 0.003          |
|                        | $a_1 \times 10^4$ | 2.81     | 0.02           |
| $\text{WH}^{\bullet+}$ | $s_1$ (nm)        | -25      | 1              |
|                        | $k_1$             | 0.926    | 0.002          |
|                        | $a_2 \times 10^4$ | 1.79     | 0.03           |
| $\text{W}^{\bullet}$   | $s_2$ (nm)        | 78       | 2              |
|                        | $k_2$             | 1.18     | 0.01           |

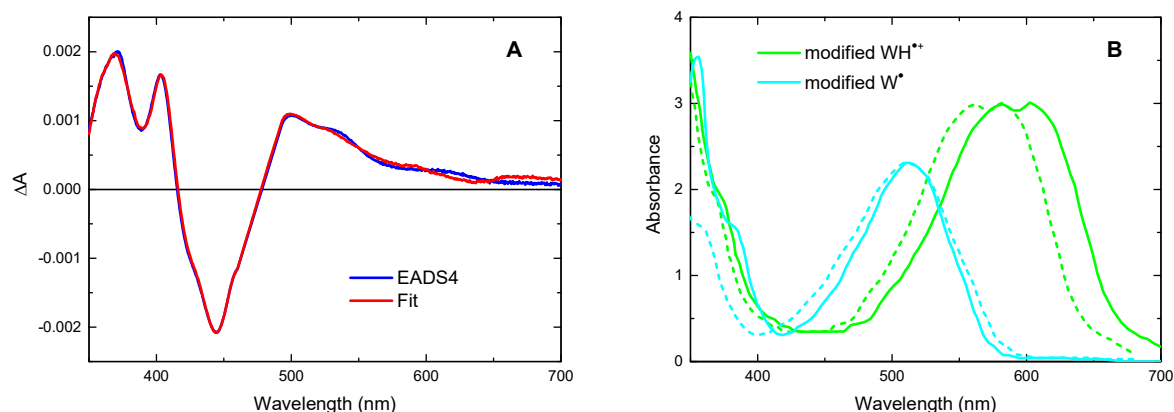

**Figure S10.** (A) Fit of EADS4 (Y345F) according to Equation S3. (B) Corresponding modified reference spectra (original spectra are recalled in dotted lines).

### Supplementary references

1. J. Brazard, A. Usman, F. Lacombat, C. Ley, M. M. Martin, P. Plaza, L. Mony, M. Heijde, G. Zabulon and C. Bowler, *J. Am. Chem. Soc.*, 2010, **132**, 4935-4945.
2. R. Martin, F. Lacombat, A. Espagne, N. Dozova, P. Plaza, J. Yamamoto, P. Müller, K. Brettel and A. de la Lande, *Phys. Chem. Chem. Phys.*, 2017, **19**, 24493-24504.
3. P. Müller, E. Ignatz, S. Kiontke, K. Brettel and L. O. Essen, *Chem. Sci.*, 2018, **9**, 1200-1212.
4. J. Brazard, A. Usman, F. Lacombat, C. Ley, M. M. Martin and P. Plaza, *J. Phys. Chem. A*, 2011, **115**, 3251-3262.
5. J. Yamamoto, K. Shimizu, T. Kanda, Y. Hosokawa, S. Iwai, P. Plaza and P. Muller, *Biochemistry*, 2017, **56**, 5356-5364.
6. P. Macheroux, in *Flavoprotein Protocols*, eds. S. K. Chapman and G. A. Reid, 1999, pp. 1-7.
7. A. Berndt, T. Kottke, H. Breitkreuz, R. Dvorsky, S. Hennig, M. Alexander and E. Wolf, *J. Biol. Chem.*, 2007, **282**, 13011-13021.
8. S. Solar, N. Getoff, P. S. Surdhar, D. A. Armstrong and A. Singh, *J. Phys. Chem.*, 1991, **95**, 3639-3643.
9. C. Aubert, P. Mathis, A. P. M. Eker and K. Brettel, *Proc. Natl. Acad. Sci. USA*, 1999, **96**, 5423-5427.
